# Supplementary material
Source: publisher figshare collection journal article supplement (https://karger.figshare.com/ndownloader/files/28365879)
Supplement: Supplementary file 1 [file 28365879]

Table S4: SIRT characteristics (internal cohort)

| **Parameter** | **n (%)** | **Median survival** | **95%-CI** | ***p*-value** |
| --- | --- | --- | --- | --- |
| **Number of sessions**  1  2  3 | 44 (61.1)  26 (36.1)  2 (2.8) | 13.0  11.2  - | 8.4-26.5  8.0-14.6  7.6- - | 0.71 |
| **Coiled artery before SIRT**  No coiling  A. gastroduodenalis  A. cystica  A. gastrica dextra  A.gastroduodenalis +  A.cystica  A. gastrica dex. + A.  cystica + A. gastro-  duodenalis | 31 (43.7)  28 (39.4)  2 (2.8)  1 (1.4)  8 (11.3)  1 (1.4) | 13.0  13.1  -  -  6.7  4.7 | 8.0- 30.2  10.5- 26.5  10.5 - -  -  3.9- 36.4  - | 0.23 |
| **1. SIRT target** treatment  Both lobes  Right lobe  Left lobe  Segmental | 72  23 (31.9)  30 (41.7)  16 (22.2)  3 (4.2) | 12.5  18.9  10.5  13.1 | 6.9- 25.5  9.9- 27.8  5.1- 34.2  7.6- - | 0.25 |
| **2. SIRT target** treatment  Both lobes  Right lobe  Left lobe  Segmental | 29  1 (3.4)  12 (41.4)  13 (44.8)  3 (10.3) | 17.3  9.9  11.2  10.5 | -  5.2- 53.3  7.7- -  3.7- 13.1 | 0.49 |
| **3. SIRT target** treatment  Left lobe  Segmental | 2    1 (50)  1 (50) |  |  | - |
| **Cessation SIRT**  No  Yes | 52 (75.4)  17 (24.6) | 12.5  14.6 | 8.3- 22.7  8.3- 29.8 | 0.48 |
| **Activity applied (MBq) (1. SIRT)**  1. Quartile: <749  2. Quartile: 749-1144  3. Quartile: 1144-1547 4. Quartile: >1547 | 71  17 (23.9)  18 (25.4)  18 (25.4)  18 (25.4) | 10.5  14.6  13.2  11.2 | 5.2- 13.1  6.5- 34.2  8.0- 29.8  6.3- 26.5 | 0.98 |
